# Supplementary material
Source: publisher figshare collection journal article supplement (https://gsajournals.figshare.com/ndownloader/files/17710697)
Supplement: Supplementary file 1 [file 17710697]

**
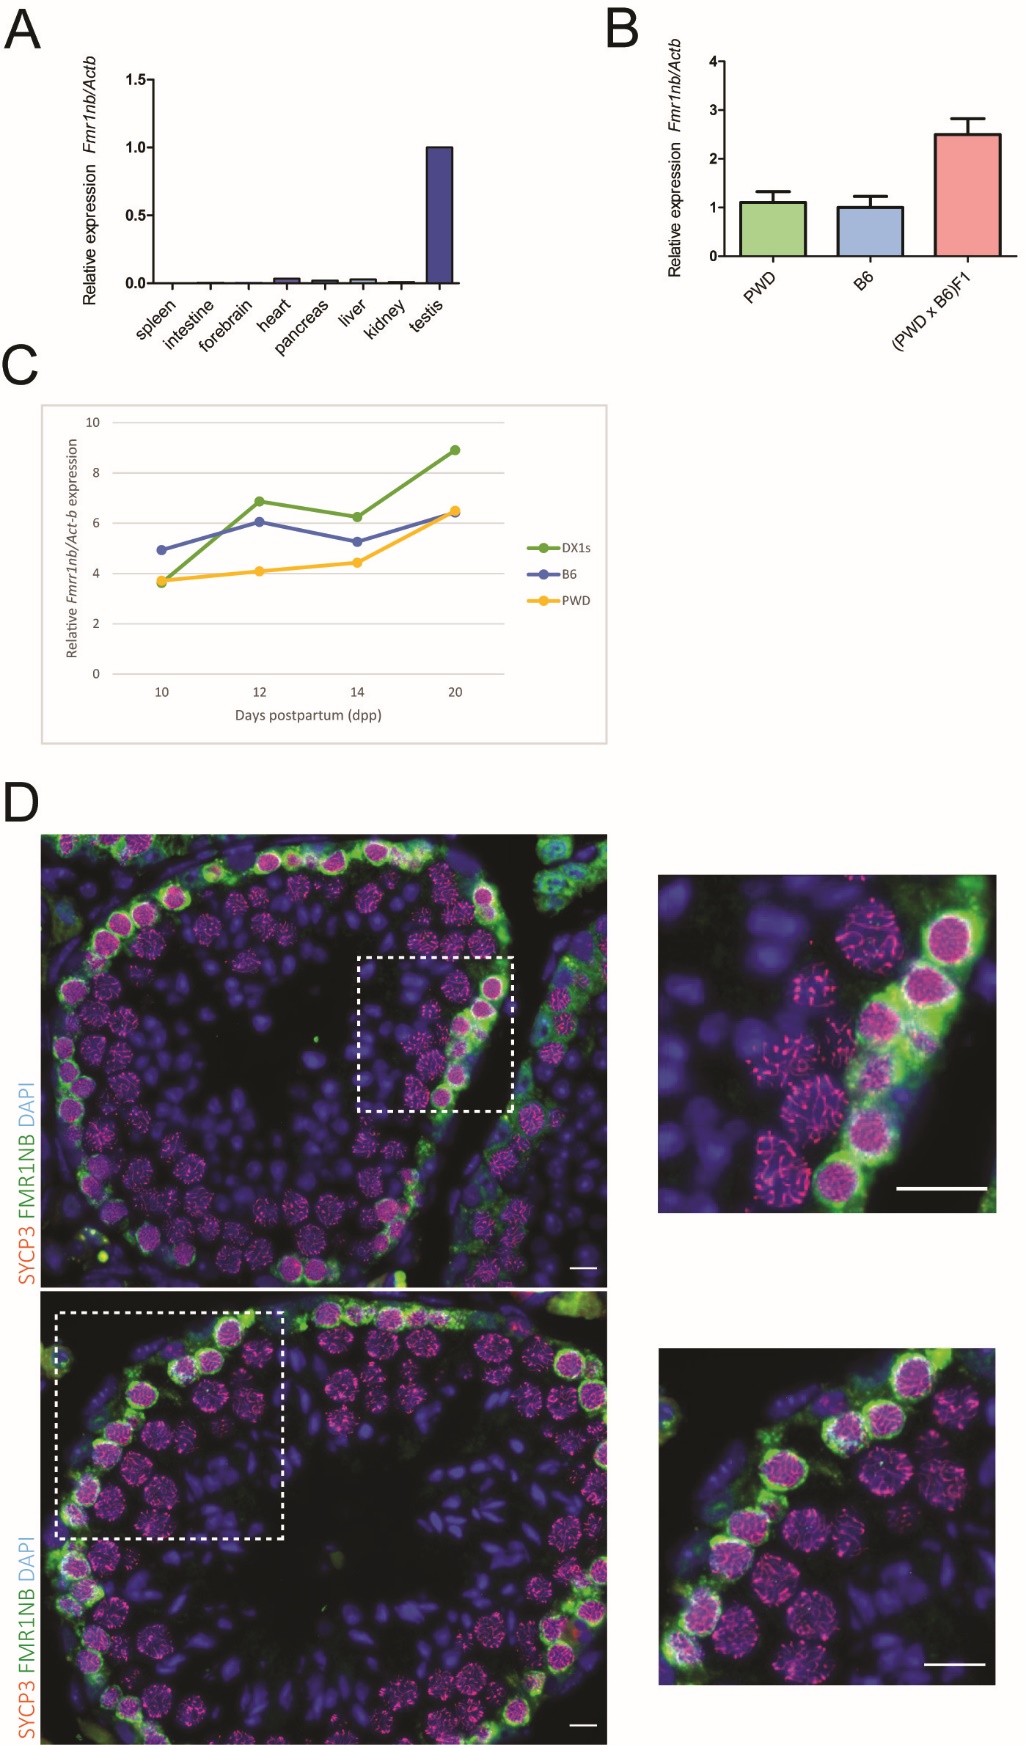
**

**Figure S2 Expression of the *Fmr1nb* gene. (A)** Tissue-specific expression of *Fmr1nb* mRNA. Relative expression of *Fmr1nb* to *Actin-b* measured by RT-qPCR and plotted for the spleen, intestine, brain, pancreas, liver, kidney and testis. **(B)** Expression of *Fmr1nb* determined by RT-qPCR in adult testis of PWD, B6 and (PWD x B6)F1 sterile hybrids. **(C)** Profiles of *Fmr1nb* mRNA in the first wave of spermatogenesis in the testis of juvenile males B6.DX.1s, PWD and B6 determined by RT-qPCR. **(D)** Immunohistochemical detection of FMR1NB and SYCP3 proteins in the histological section of testis of the B6.DX.1s mouse. FMR1NB expression appears in early stages of meiotic prophase I but not in the pachytene spermatocytes. The pachytene spermatocytes, determined by typical SYCP3 staining pattern, are shown at higher magnification. Data in B and C are presented as a mean of three independent biological replicates (±SD). FMR1NB, green; SYCP3, violet; DAPI, blue. Scale bar, 10 m (D).
